# Supplementary material
Source: HighWire-hosted journal article supplement (https://heart.bmj.com/content/104/10/814)
Supplement: inline-supplementary-material-2 [file inline-supplementary-material-2.pdf]

$\Delta$  Mean gradient (mmHg)

**p=0.001**

6  
4  
2  
0  
-2  
-4  
-6

**p=0.287**

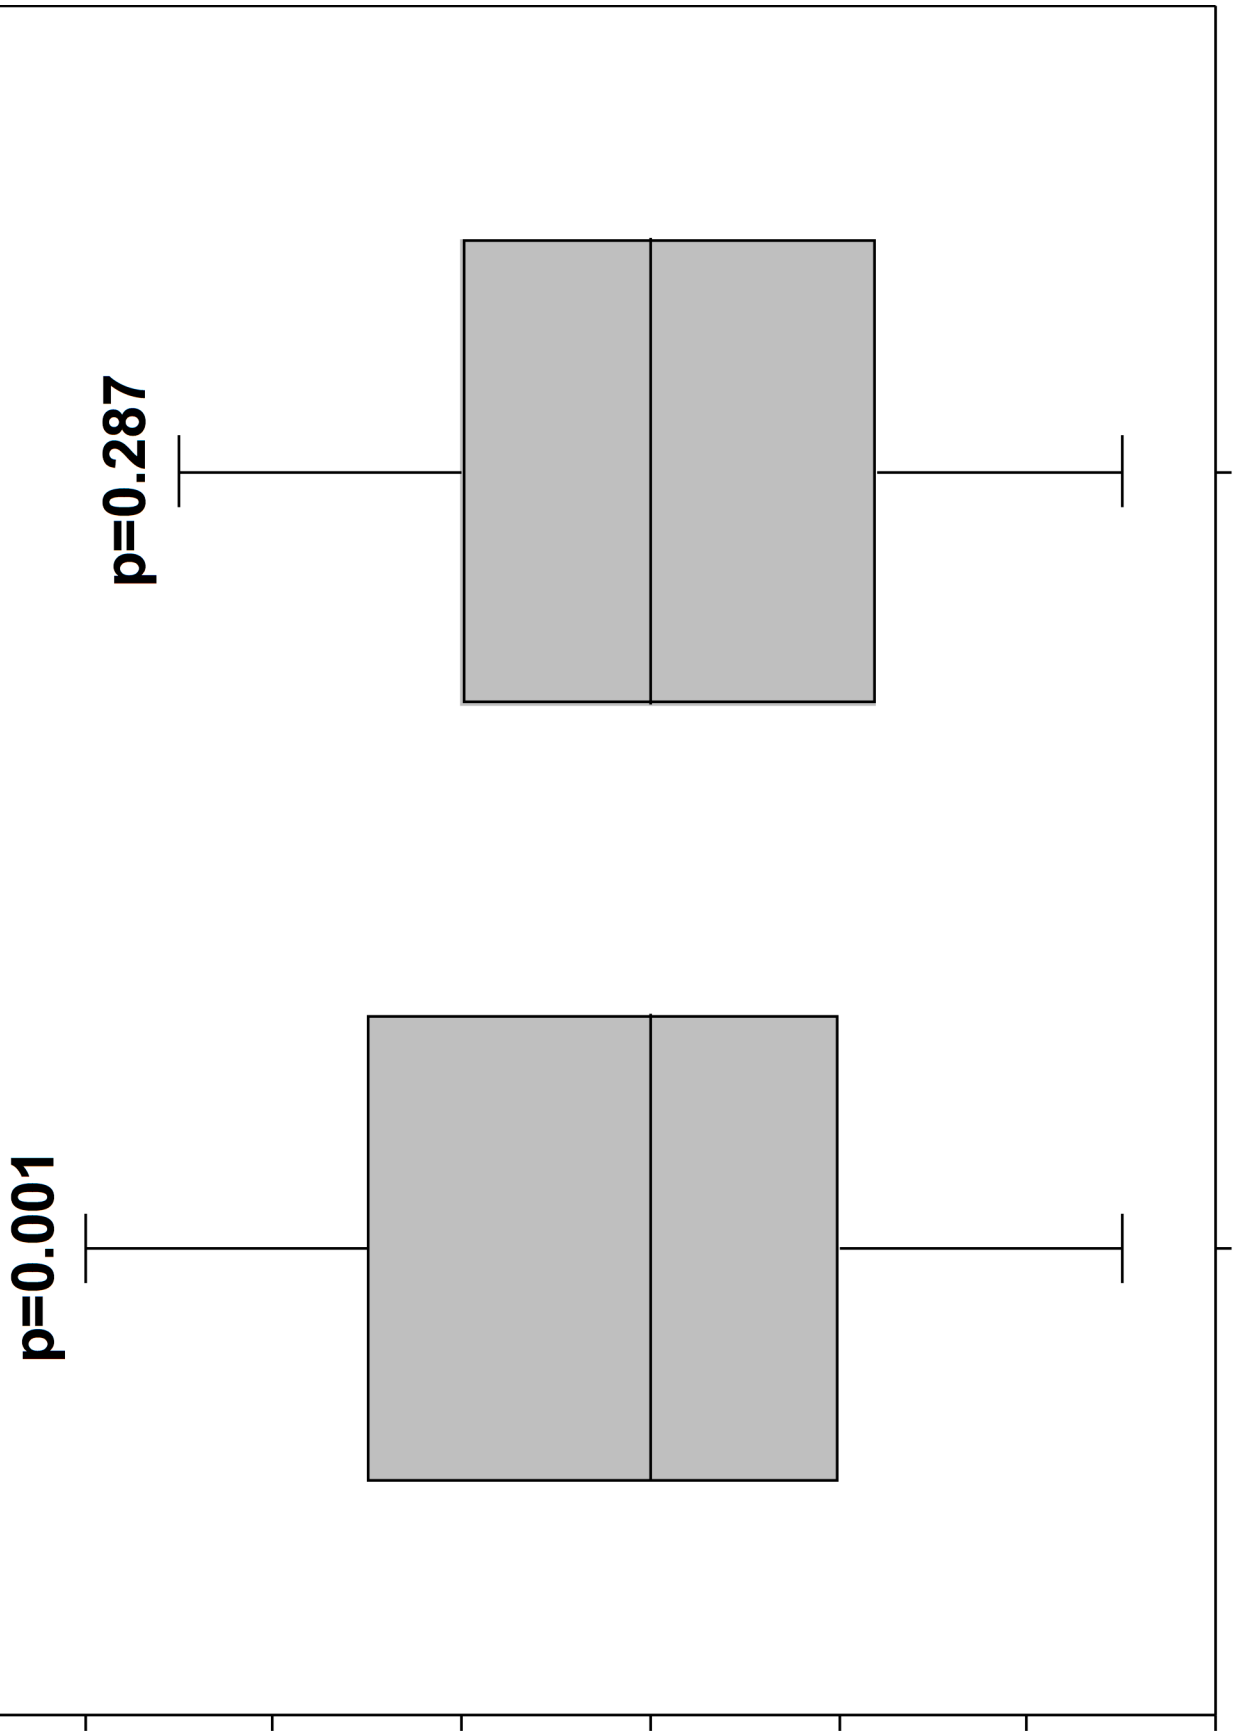

**No Anticoagulation  
at discharge**

**Anticoagulation  
at discharge**

**p=0.008, between groups**
