# Supplementary material
Source: HighWire-hosted journal article supplement (https://heart.bmj.com/content/104/10/814)

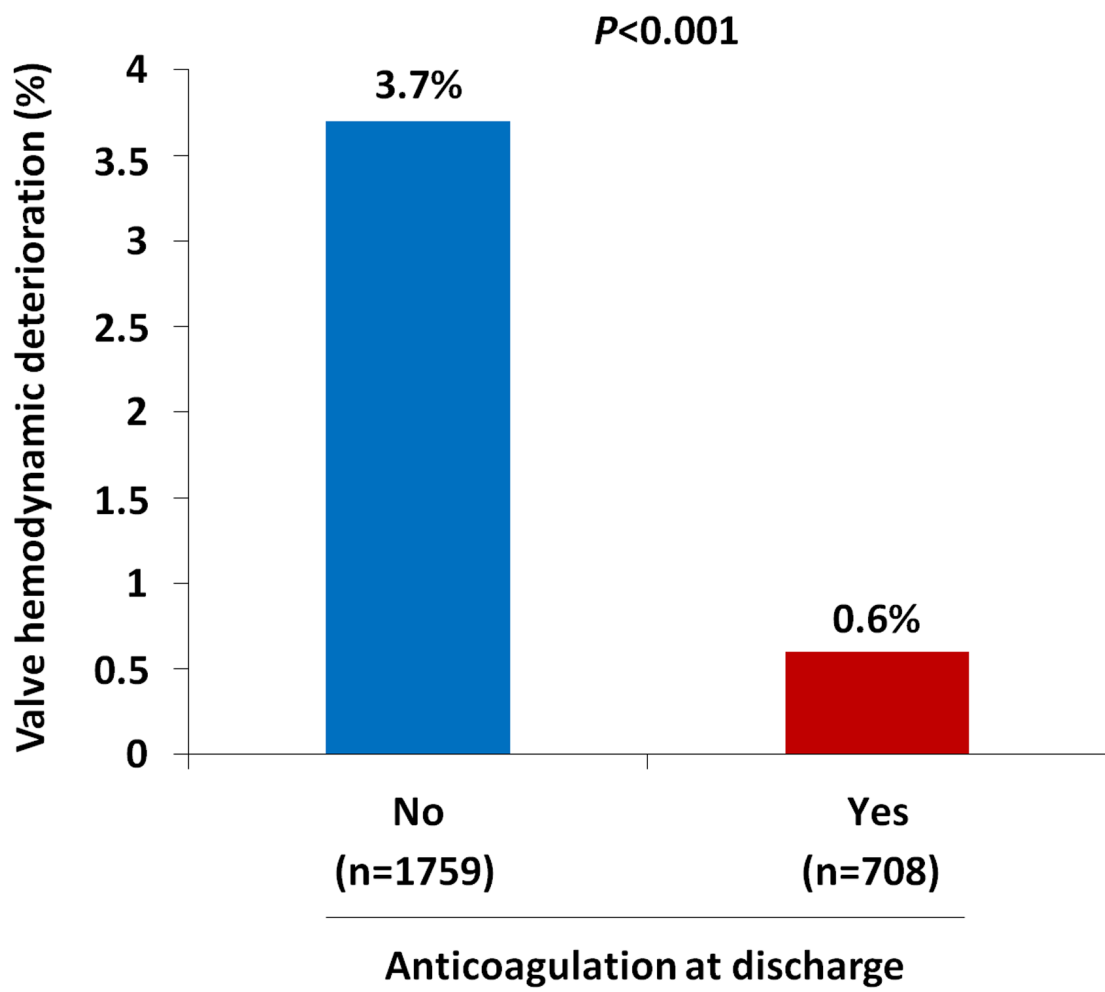

Supplement: inline-supplementary-material-3 [file inline-supplementary-material-3.pdf]

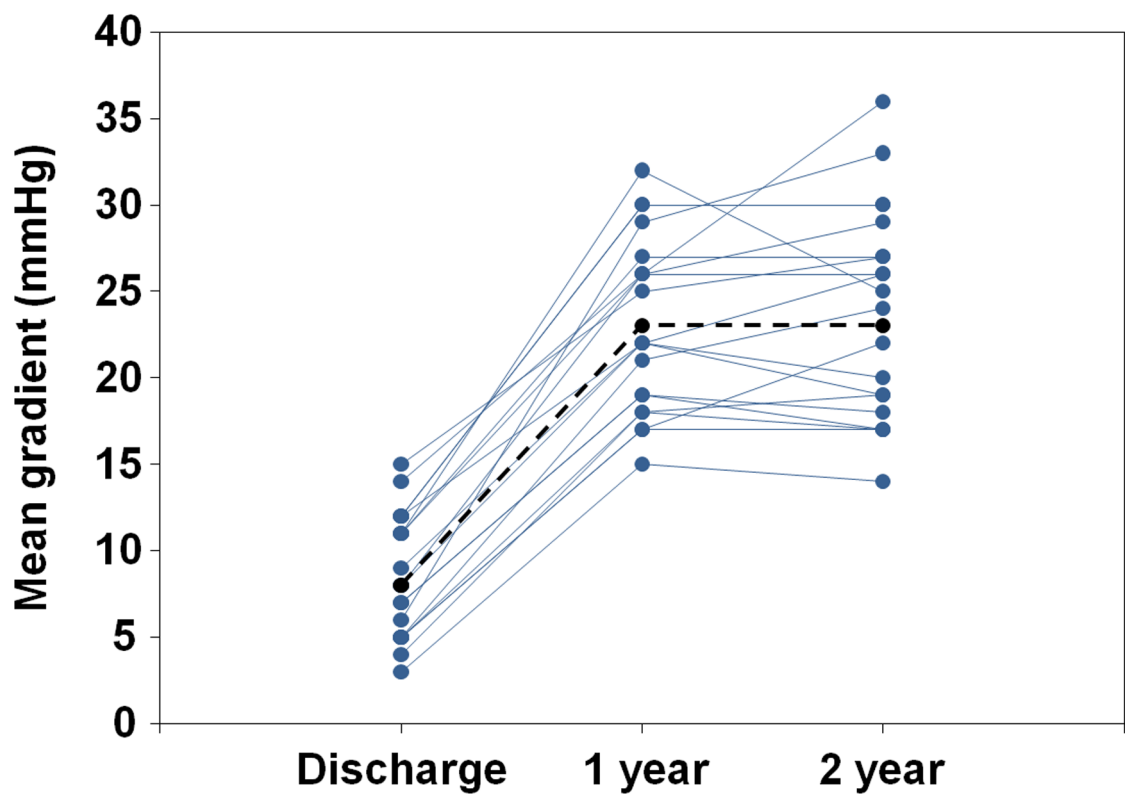

Supplement: inline-supplementary-material-4 [file inline-supplementary-material-4.pdf]
